# Supplementary material for: The Sierra Leone Ultrasound Rainbow4Africa Project (SLURP): an observational study of ultrasound effectiveness in developing countries
Source: Springer Nature journal article supplement (doi:10.1186/s13089-016-0051-y), 2016-10-25
Supplement: MOESM2 [file 10986282]

# HSH Ultrasound Data Sheet pre-US

Clinician should fulfill only the grey-shadowed boxes and write in capital letters

|              |         |                                                       |                    |                            |
|--------------|---------|-------------------------------------------------------|--------------------|----------------------------|
| 1<br>Patient | Surname |                                                       | Date of birth      | __/__/__                   |
|              | Name    |                                                       | Date of enrollment | __/__/__                   |
|              | Sex     | <input type="checkbox"/> M <input type="checkbox"/> F | Serial number      |                            |
|              | Vitals  | BP: ____/____ mmHg                                    | HR: _____ bpm      | SpO <sub>2</sub> : _____ % |

|                                                                                                                                                                                                                   |                                                                   |                                                                                                                                                                                                                                                                                                                                                                                                                                                                                                                                                                                                                                                                                     |
|-------------------------------------------------------------------------------------------------------------------------------------------------------------------------------------------------------------------|-------------------------------------------------------------------|-------------------------------------------------------------------------------------------------------------------------------------------------------------------------------------------------------------------------------------------------------------------------------------------------------------------------------------------------------------------------------------------------------------------------------------------------------------------------------------------------------------------------------------------------------------------------------------------------------------------------------------------------------------------------------------|
| 2<br>Clinician requesting US scan                                                                                                                                                                                 | Name                                                              | Dr.                                                                                                                                                                                                                                                                                                                                                                                                                                                                                                                                                                                                                                                                                 |
|                                                                                                                                                                                                                   | Main complaint of the patient (sign one)                          | <input type="checkbox"/> Abdominal pain<br><input type="checkbox"/> Abdominal distension and discomfort<br><input type="checkbox"/> Cough<br><input type="checkbox"/> Palpitation<br><input type="checkbox"/> Swelling of feet<br><input type="checkbox"/> Chest pain and burns<br><input type="checkbox"/> Dyspnea<br><input type="checkbox"/> Menstrual problems<br><input type="checkbox"/> Obstetrics problems<br><input type="checkbox"/> Difficulty in passing urine<br><input type="checkbox"/> Other (specify _____)                                                                                                                                                        |
|                                                                                                                                                                                                                   | What is your pre US differential diagnosis list? (sign 1 or more) | <input type="checkbox"/> 1. PUD<br><input type="checkbox"/> 2. Pneumonia<br><input type="checkbox"/> 3. Pelvic muscle syndrome<br><input type="checkbox"/> 4. Pleural Effusion<br><input type="checkbox"/> 5. Cardiomyopathy<br><input type="checkbox"/> 6. Liver cirrhosis/Schistosomiasis<br><input type="checkbox"/> 7. Cholecystolithiasis<br><input type="checkbox"/> 8. Gastritis/GERD<br><input type="checkbox"/> 9. Acute/Chronic nephritis<br><input type="checkbox"/> 10. Nephrolithiasis/Idronephrosis<br><input type="checkbox"/> 11. Uterus Myomatosis<br><input type="checkbox"/> 12. Adnexitis / GUT Infection<br><input type="checkbox"/> 13. Other (specify _____) |
| How <b>certain</b> is the ordering physician about the patient's diagnosis <b>prior</b> to the ultrasound scan?                                                                                                   |                                                                   |                                                                                                                                                                                                                                                                                                                                                                                                                                                                                                                                                                                                                                                                                     |
| <input type="checkbox"/> 1. Very uncertain <input type="checkbox"/> 2. Uncertain <input type="checkbox"/> 3. Exactly midway <input type="checkbox"/> 4. Somewhat certain <input type="checkbox"/> 5. Very certain |                                                                   |                                                                                                                                                                                                                                                                                                                                                                                                                                                                                                                                                                                                                                                                                     |

|              |                                               |                                                                                                                                        |
|--------------|-----------------------------------------------|----------------------------------------------------------------------------------------------------------------------------------------|
| 3<br>Therapy | Proposed <b>without US</b>                    | <input type="checkbox"/> Medical therapy <input type="checkbox"/> Surgical therapy <input type="checkbox"/> Referral to other Hospital |
|              | Therapy would consist in: (short description) |                                                                                                                                        |

|              |                                          |                                                                                                                                                                                                                                                 |
|--------------|------------------------------------------|-------------------------------------------------------------------------------------------------------------------------------------------------------------------------------------------------------------------------------------------------|
| 4<br>US scan | Type of study requested (sign 1 or more) | <input type="checkbox"/> Cardiac superficial<br><input type="checkbox"/> Chest<br><input type="checkbox"/> Abdomen<br><input type="checkbox"/> Ob/Gyn<br><input type="checkbox"/> Soft tissue<br><input type="checkbox"/> Other (specify _____) |
|              |                                          |                                                                                                                                                                                                                                                 |

# HSH Ultrasound Data Sheet post-US

Clinician should fulfill only the grey-shadowed boxes and write in capital letters

**5** Patient name

**6**

|                                |                                                                                                                 |                                                                                                                                                                                                                                                                                                                                                                                                                                                                                                                                                                                                                                                                                                                                                                                                                                                                                                                                                                       |  |  |
|--------------------------------|-----------------------------------------------------------------------------------------------------------------|-----------------------------------------------------------------------------------------------------------------------------------------------------------------------------------------------------------------------------------------------------------------------------------------------------------------------------------------------------------------------------------------------------------------------------------------------------------------------------------------------------------------------------------------------------------------------------------------------------------------------------------------------------------------------------------------------------------------------------------------------------------------------------------------------------------------------------------------------------------------------------------------------------------------------------------------------------------------------|--|--|
| <b>Clinician after US scan</b> | Name                                                                                                            | Dr. _____                                                                                                                                                                                                                                                                                                                                                                                                                                                                                                                                                                                                                                                                                                                                                                                                                                                                                                                                                             |  |  |
|                                | What is your <b>post US differential diagnosis</b> list? (sign 1 or more)                                       | <input type="checkbox"/> 1. PUD <span style="margin-left: 150px;"><input type="checkbox"/> 8. Gastritis/GERD</span><br><input type="checkbox"/> 2. Pneumonia <span style="margin-left: 150px;"><input type="checkbox"/> 9. Acute/Chronic nephritis</span><br><input type="checkbox"/> 3. Pelvic muscle syndrome <span style="margin-left: 150px;"><input type="checkbox"/> 10. Nephrolithiasis/Idronephrosis</span><br><input type="checkbox"/> 4. Pleural Effusion <span style="margin-left: 150px;"><input type="checkbox"/> 11. Uterus Myomatosis</span><br><input type="checkbox"/> 5. Cardiomiopathy <span style="margin-left: 150px;"><input type="checkbox"/> 12. Adnexitis / GUT Infection</span><br><input type="checkbox"/> 6. Liver cirrosis/Schistosomiasis <span style="margin-left: 150px;"><input type="checkbox"/> 13. Other (specify _____)</span><br><input type="checkbox"/> 7. Cholecystolithiasis <span style="margin-left: 150px;">_____</span> |  |  |
|                                | Did US scan add <b>unexpected</b> diagnosis to this patient?                                                    | <input type="checkbox"/> Yes (specify _____) <input type="checkbox"/> No                                                                                                                                                                                                                                                                                                                                                                                                                                                                                                                                                                                                                                                                                                                                                                                                                                                                                              |  |  |
|                                | How <b>certain</b> is the ordering physician about the patient's diagnosis <b>after</b> to the ultrasound scan? | <input type="checkbox"/> 1. Very uncertain <input type="checkbox"/> 2. Uncertain <input type="checkbox"/> 3. Exactly midway <input type="checkbox"/> 4. Somewhat certain <input type="checkbox"/> 5. Very certain                                                                                                                                                                                                                                                                                                                                                                                                                                                                                                                                                                                                                                                                                                                                                     |  |  |

**7**

|                |                                               |                                                                                                                                                                                                                        |  |  |
|----------------|-----------------------------------------------|------------------------------------------------------------------------------------------------------------------------------------------------------------------------------------------------------------------------|--|--|
| <b>Therapy</b> | Proposed <b>with</b> US                       | <input type="checkbox"/> Medical therapy <span style="margin-left: 50px;"><input type="checkbox"/> Surgical therapy</span> <span style="margin-left: 50px;"><input type="checkbox"/> Referral to other Hospital</span> |  |  |
|                | Therapy would consist in: (short description) |                                                                                                                                                                                                                        |  |  |

**8**

|                 |                                                                                               |  |
|-----------------|-----------------------------------------------------------------------------------------------|--|
| <b>Comments</b> | Hypothetically, how did this study affect your management of this patient? (free description) |  |
|-----------------|-----------------------------------------------------------------------------------------------|--|
